# Supplementary material for: Breast cancer in pregnancy: a comprehensive review of diagnosis, management, and outcomes
Source: PubMed Central journal article supplement — Transl Breast Cancer Res. 2024 Jul 25;5:21. doi: 10.21037/tbcr-24-26 (PMC11342000; doi:10.21037/tbcr-24-26), 2024-07-25
Supplement: tbcr-05-21-prf.pdf [file tbcr-05-21-prf.pdf]

Peer Review File

Article information: <https://dx.doi.org/10.21037/tbcr-24-26>

Reviewer Comments

**Comment 1:** Staging of breast cancer in pregnancy with ultralow dose [18F]-FDG-PET/CT

**Reply 1:** We added comments in the discussion with reference added as reference number 17 in the final submission

**Comment 2:** Consideration of proton radiation therapy

**Reply 2:** Added in discussion at page 8

**Comment 3:** Addition in discussion, consideration given to the specific advisory board for pregnant patients

**Reply 3:** Added page 9 with reference numbers 48 and 49
